# Supplementary material
Source: PubMed Central journal article supplement (PMC3951176)
Supplement: NIHMS558311-supplement-775_2013_1087_MOESM1_ESM.pdf [file NIHMS558311-supplement-775_2013_1087_MOESM1_ESM.pdf]

## Supplementary material

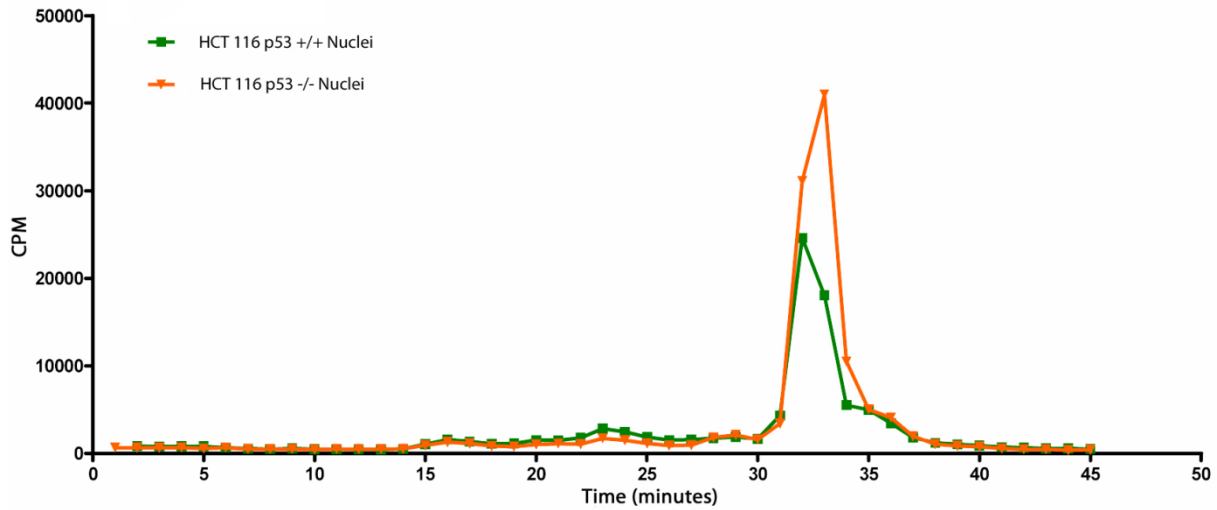

Size-exclusion HPLC analysis of HCT116 p53<sup>+/+</sup> and p53<sup>-/-</sup> cell nuclei after incubation with [<sup>64</sup>Cu]copper acetate. Cells were pre-treated with CisPt (40 μM) for 24 h and incubated with [<sup>64</sup>Cu]copper acetate (300 μCi) for another 24 h. Nuclear fractions were collected and nuclear pellets were sonicated for 30 sec and spun down to obtain the supernatants. Size-exclusion high performance liquid chromatography (HPLC) was used to separate the copper-binding partner from the supernatant. One sample per minute was collected and a Beckman 8000 (Beckman) gamma counter was used to count the radioactivity in the size-exclusion HPLC fractions. Different amount of protein from HCT116 p53<sup>+/+</sup> and p53<sup>-/-</sup> cell nuclei samples was loaded on the size-exclusion HPLC column.
